# Supplementary material for: Vertical distribution of black carbon and its mixing state in urban boundary layer in summer
Source: Copernicus journal article supplement (doi:10.5194/acp-2022-736), 2023-01-16
Supplement: Supplementary file 1 [file acp-2022-736-supplement.pdf]

**Tabel S1 Detail timetable of the vertical profile measurement**

| Date | Ascending start time | Ascending time | start | Descending start time | start | Descending end time |
|------|----------------------|----------------|-------|-----------------------|-------|---------------------|
| 6/15 | 14:01                | 14:25          |       | 15:01                 |       | 15:31               |
| 6/17 | 7:04                 | 7:34           |       | 8:15                  |       | 8:45                |
| 6/17 | 18:03:16             | 18:33:39       |       | 19:15:33              |       | 19:45:47            |
| 6/17 | 22:00                | 22:30:30       |       | 23:00:05              |       | 23:30:25            |
| 6/18 | 7:00                 | 7:31           |       | 8:15                  |       | 8:45:25             |
| 6/18 | 11:00                | 11:30:38       |       | 12:16:20              |       | 12:46:40            |
| 6/18 | 18:00                | 18:30:30       |       | 19:15:02              |       | 19:45:20            |
| 6/24 | 18:00:15             | 18:30:40       |       | 19:15:07              |       | 19:45:22            |
| 6/24 | 22:00:05             | 22:30          |       | 23:15                 |       | 23:45               |
| 6/25 | 7:00                 | 7:30:30        |       | 8:15                  |       | 8:45:22             |
| 6/25 | 11:00                | 11:30:37       |       | 12:15:15              |       | 12:46               |
| 6/25 | 18:00                | 18:30:22       |       | 19:15                 |       | 19:45:25            |
| 6/27 | 18:30:15             | 19:00:45       |       | 19:45                 |       | 20:15:20            |
| 6/27 | 22:00:50             | 22:31:15       |       | 23:14:40              |       | 23:45:30            |
| 6/28 | 11:00                | 11:30:30       |       | 12:15:09              |       | 12:45:22            |
| 6/28 | 18:00:01             | 18:30:23       |       | 19:15:04              |       | 19:45:28            |
| 6/29 | 11:00:03             | 11:30:30       |       | 12:15:03              |       | 12:45:20            |
| 6/29 | 18:00:05             | 18:30:25       |       | 19:15:05              |       | 19:45:20            |
| 6/29 | 22:06:10             | 22:36:40       |       | 23:21                 |       | 23:51               |
| 6/30 | 7:00:05              | 7:30:25        |       | 8:15:05               |       | 8:45:30             |
| 6/30 | 10:59:55             | 11:30:30       |       | 12:15                 |       | 12:45:16            |
| 6/30 | 18:00                | 18:30:20       |       | 19:15                 |       | 19:45:40            |
| 7/1  | 11:00                | 11:30:24       |       | 12:15                 |       | 12:45:12            |
| 7/1  | 18:00                | 18:30:23       |       | 19:50                 |       | 20:15:00            |
| 7/1  | 22:00                | 22:30:28       |       | 23:15                 |       | 23:45:22            |
| 7/2  | 7:00                 | 7:30:32        |       | 8:15:04               |       | 8:45:30             |
| 7/2  | 11:00                | 11:30:30       |       | 12:15:04              |       | 12:45:30            |
| 7/2  | 18:00                | 18:30:32       |       | 19:15                 |       | 19:45:25            |
| 7/2  | 22:00                | 22:30:30       |       | 23:15                 |       | 12:45:30            |
| 7/7  | 7:04                 | 7:34:40        |       | 8:18:11               |       | 8:48:50             |
| 7/7  | 11:02:16             | 11:32:45       |       | 12:17:06              |       | 12:47:30            |
| 7/7  | 18:00                | 18:30:30       |       | 19:15                 |       | 19:45:20            |
| 7/7  | 22:00                | 22:30:40       |       | 23:15                 |       | 23:45:30            |
| 7/8  | 7:00:29              | 7:30:48        |       | 8:15:05               |       | 8:45:32             |
| 7/8  | 11:00:11             | 11:30:41       |       | 12:15:10              |       | 12:45:40            |
| 7/8  | 18:00:00             | 18:30:25       |       | 19:15:10              |       | 19:45:25            |
| 7/8  | 22:00:00             | 22:30:23       |       | 23:15:05              |       | 23:45:25            |
| 7/9  | 11:00:00             | 11:30:30       |       | 12:15:00              |       | 12:45:25            |
| 7/9  | 18:00:02             | 18:30:32       |       | 19:15                 |       | 19:45:30            |
| 7/9  | 22:00:03             | 22:30:35       |       | 22:46:00              |       | 23:16:35            |
| 7/10 | 11:00                | 11:30:28       |       | 12:15                 |       | 12:45:25            |
| 7/10 | 18:00                | 18:30:26       |       | 19:15                 |       | 19:45:30            |
| 7/10 | 22:00                | 22:30:26       |       | 23:15                 |       | 23:45:20            |
| 7/11 | 6:00:00              | 06:30:25       |       | 07:15:02              |       | 7:45                |
| 7/11 | 11:00:00             | 11:30:26       |       | 12:15:05              |       | 12:45:30            |
| 7/11 | 18:00:00             | 18:30:23       |       | 19:15:06              |       | 19:42:00            |
| 7/12 | 22:00:00             | 22:30          |       | 23:15                 |       | 23:45               |
| 7/13 | 6:00:02              | 6:30:30        |       | 7:15:02               |       | 7:45:30             |
| 7/13 | 11:00:02             | 11:30:30       |       | 12:15:02              |       | 12:45:30            |
| 7/13 | 22:00:02             | 22:30:30       |       | 23:15:10              |       | 23:45:42            |
| 7/14 | 8:00                 | 8:30:30        |       | 9:15                  |       | 9:45:30             |
| 7/14 | 11:00                | 11:30:30       |       | 12:15:05              |       | 12:45:24            |
| 7/14 | 22:00                | 22:30:33       |       | 23:15:00              |       | 23:45:20            |
| 7/15 | 6:00                 | 6:30:25        |       | 7:15                  |       | 7:45:46             |

---

|      |          |          |          |          |
|------|----------|----------|----------|----------|
| 7/15 | 11:03:40 | 11:34:00 | 12:15:00 | 12:45:20 |
| 7/15 | 22:00:05 | 22:30:25 | 23:15:00 | 23:45:20 |

---

**Tabel S2 Brief summarize of the instruments in the moveable container**

| Instruments                                     | Abbreviation | Manufactory                      | Measuring parameters                         |
|-------------------------------------------------|--------------|----------------------------------|----------------------------------------------|
| Single particle soot photometer                 | SP2          | Droplet measurement technologies | BC concentration<br>MMD<br>$D_p/D_c$         |
| Photoacoustic extincionometer                   | PAX          | Droplet measurement technologies | $PM_{2.5} b_{sca} (\lambda= 870 \text{ nm})$ |
| Aethalometer                                    | AE33         | Magee Scientific Corp.           | $b_{abs} (\lambda= 880 \text{ nm})$          |
| 49i O <sub>3</sub> analyzer                     |              | Thermo Scientific                | O <sub>3</sub> concentration                 |
| 42i NO-NO <sub>2</sub> -NO <sub>x</sub> analyze |              | Thermo Scientific                | NO,NO <sub>2</sub> concentration             |
| 48i CO analyzer                                 |              | Thermo Scientific                | CO concentration                             |

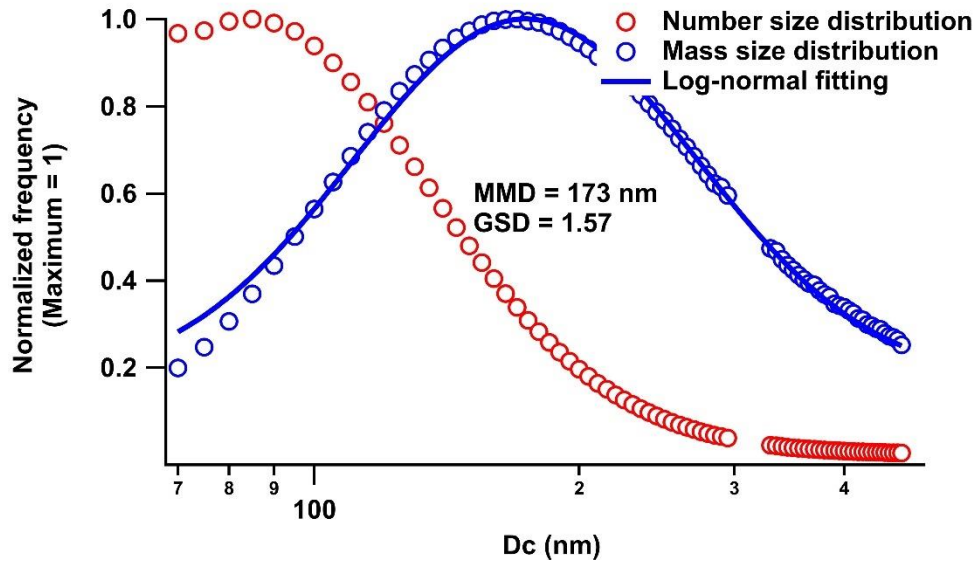

Figure. S1 Size distribution of BC core during the entire observation.

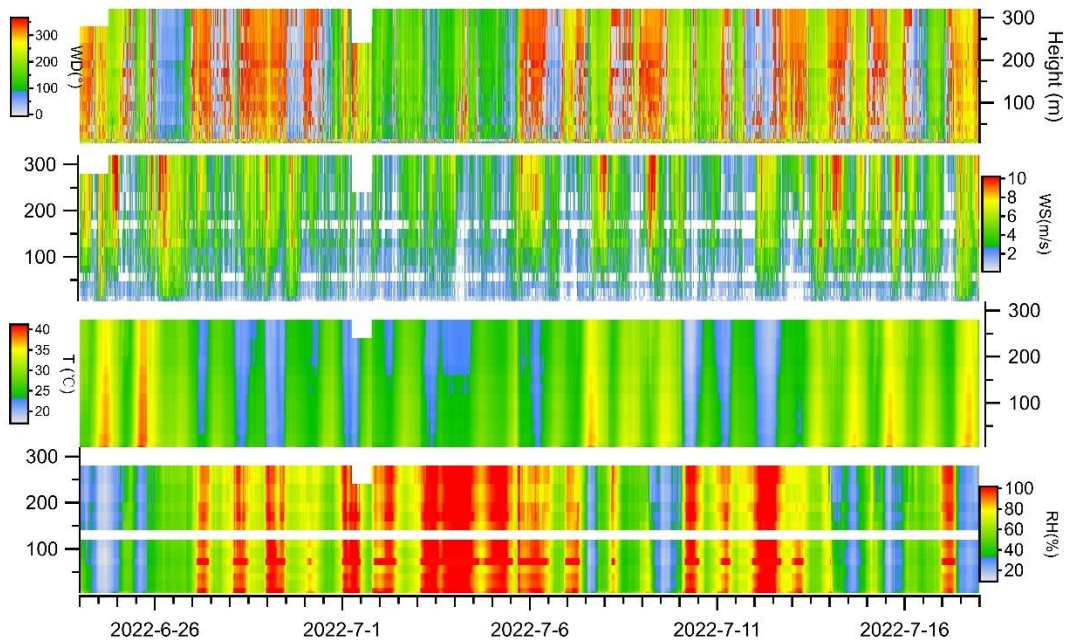

Figure. S2 Meteorology conditions (0-320 m) during the observation period.

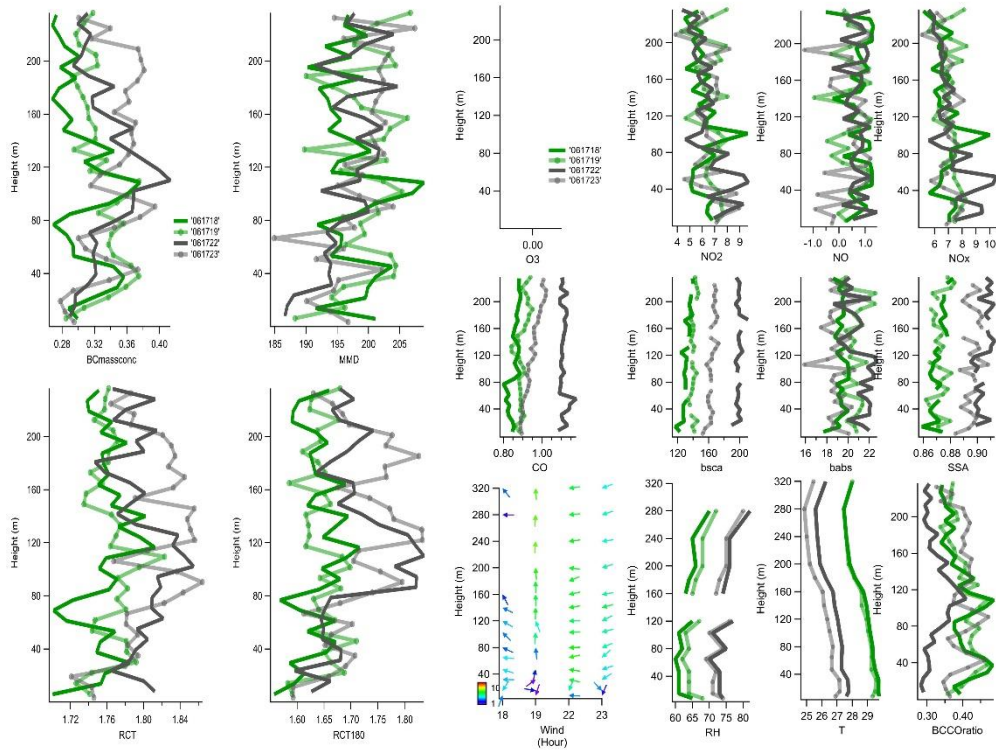

**Figure S3 Vertical profiles during 17<sup>th</sup> June. RCT denotes  $D_p/D_c$  and RCT180 denotes the  $D_p/D_c$  for BC with  $D_c = 180 \pm 10$  nm.**

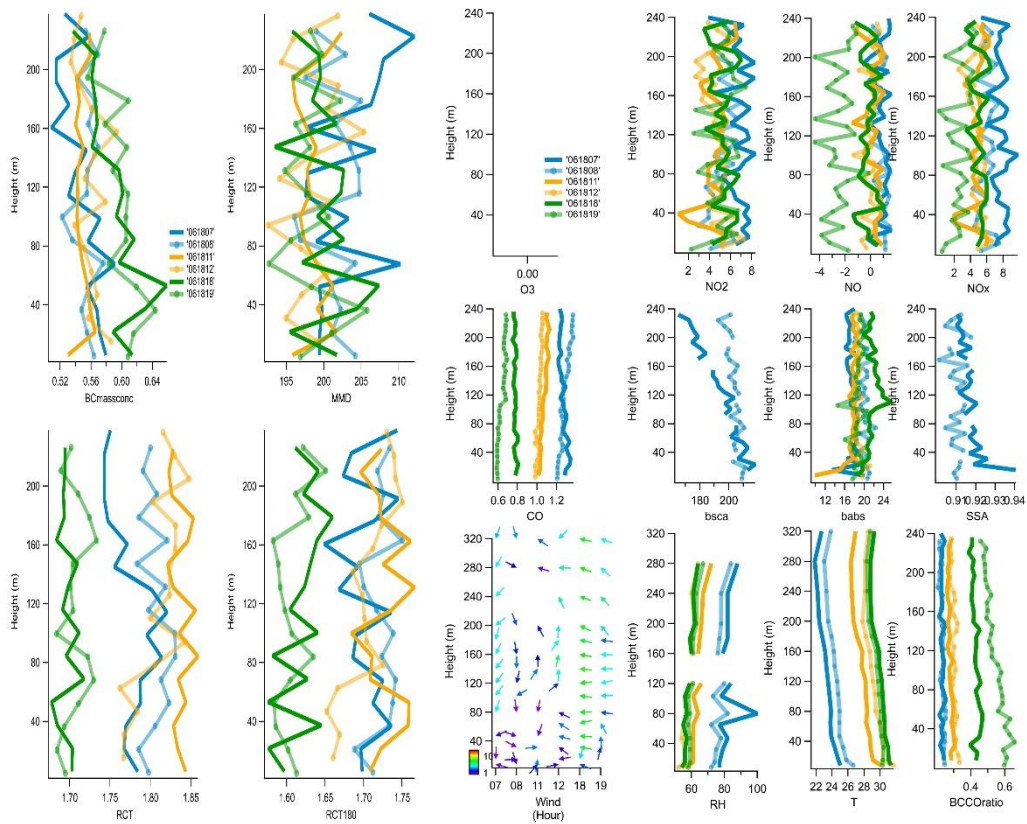

**Figure S4 Vertical profiles during 18<sup>th</sup> June**

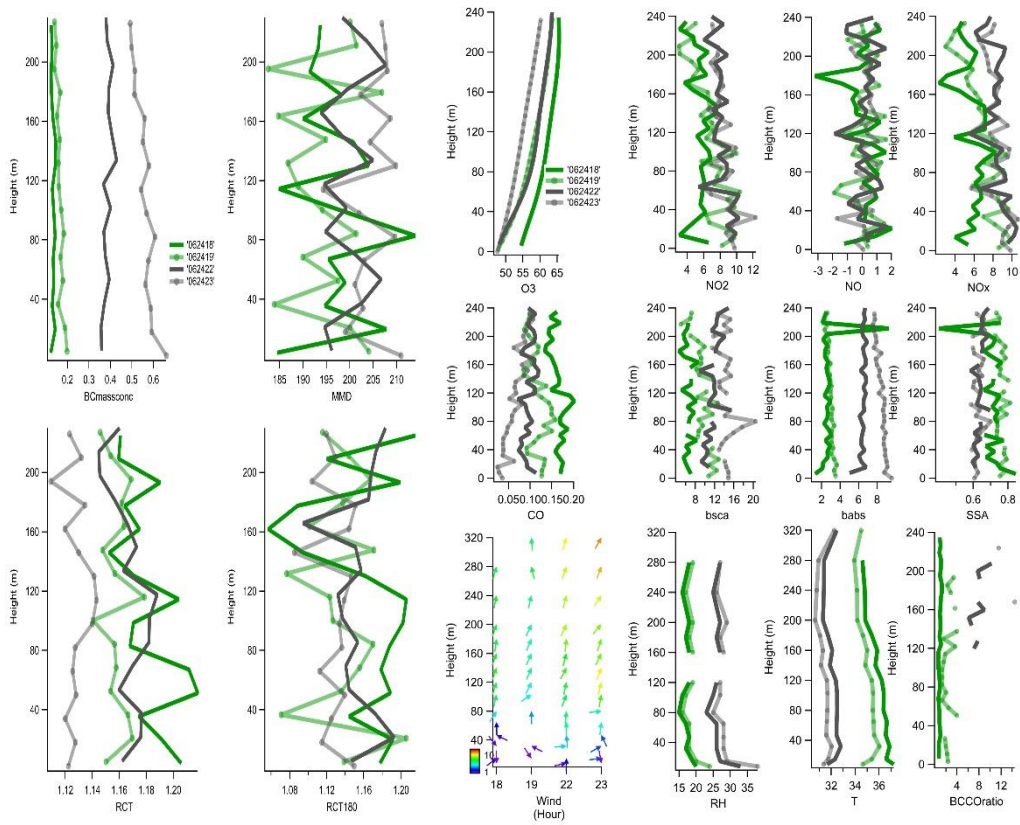

Figure S5 Vertical profiles during 24<sup>th</sup> June

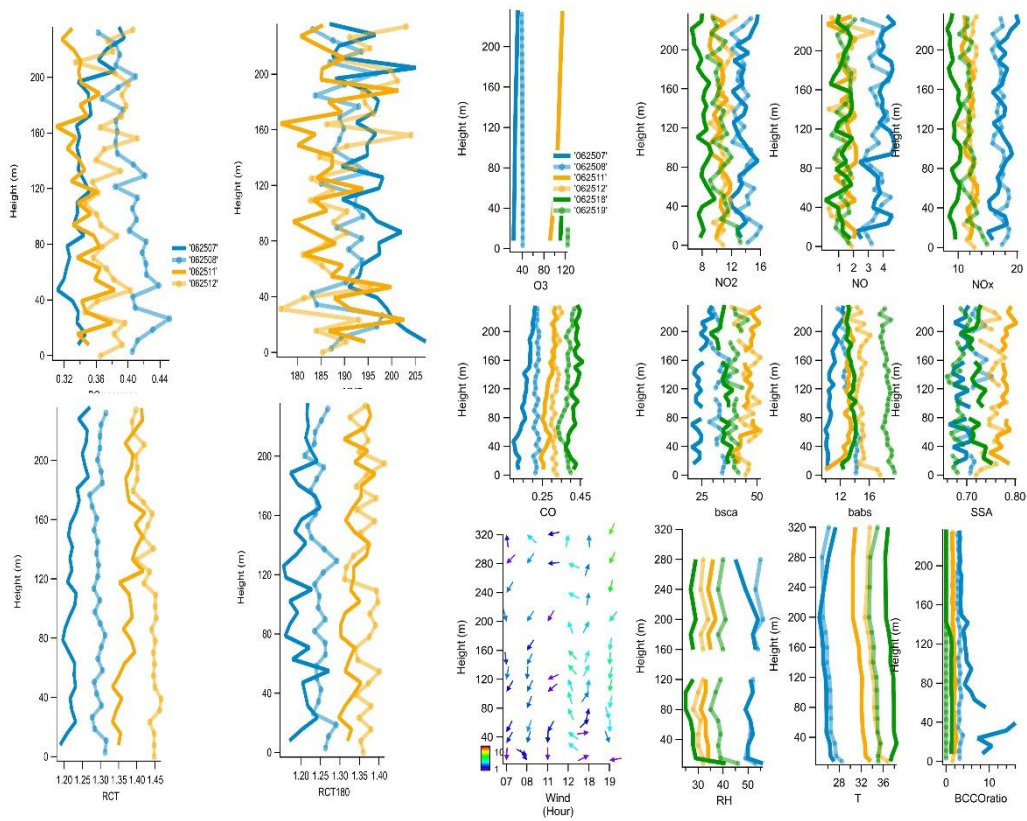

Figure S6 Vertical profiles during 25<sup>th</sup> June

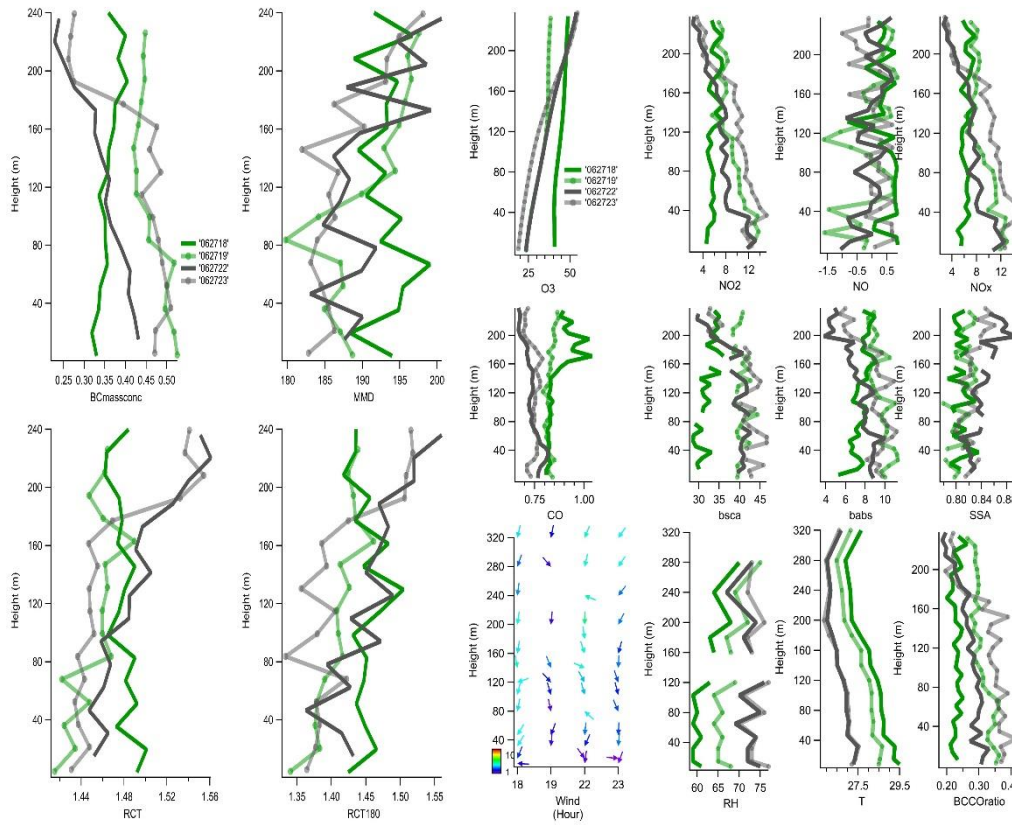

Figure S7 Vertical profiles during 27<sup>th</sup> June

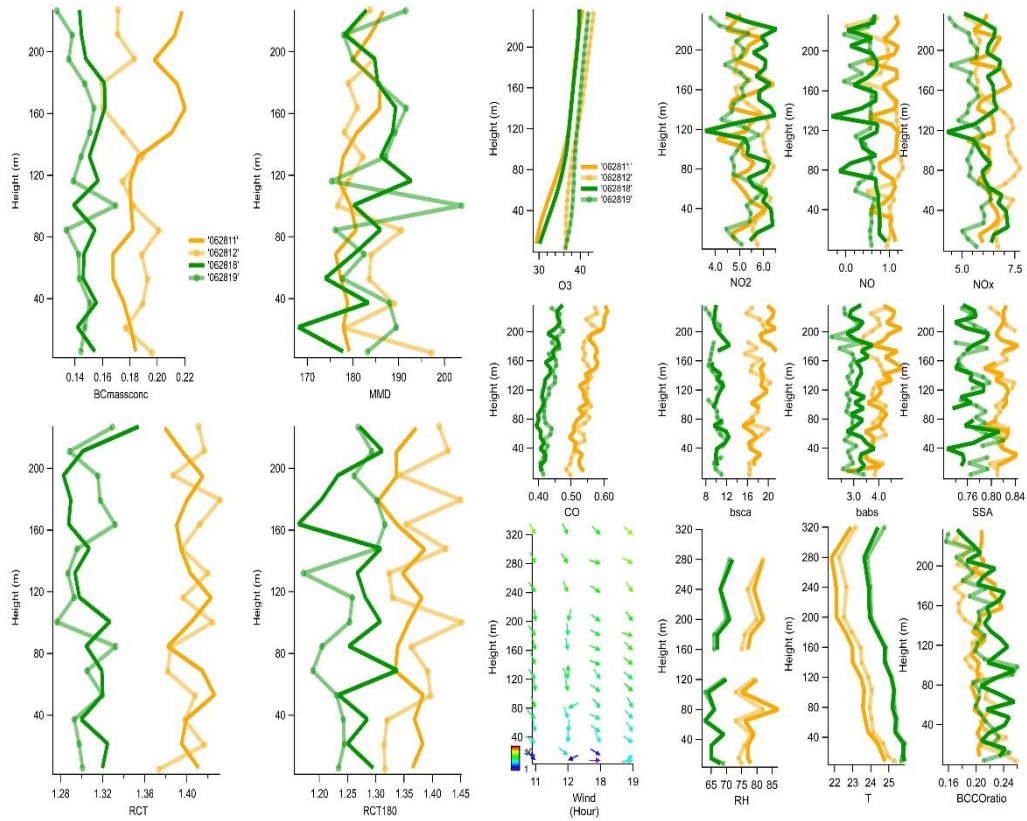

Figure S8 Vertical profiles during 28<sup>th</sup> June

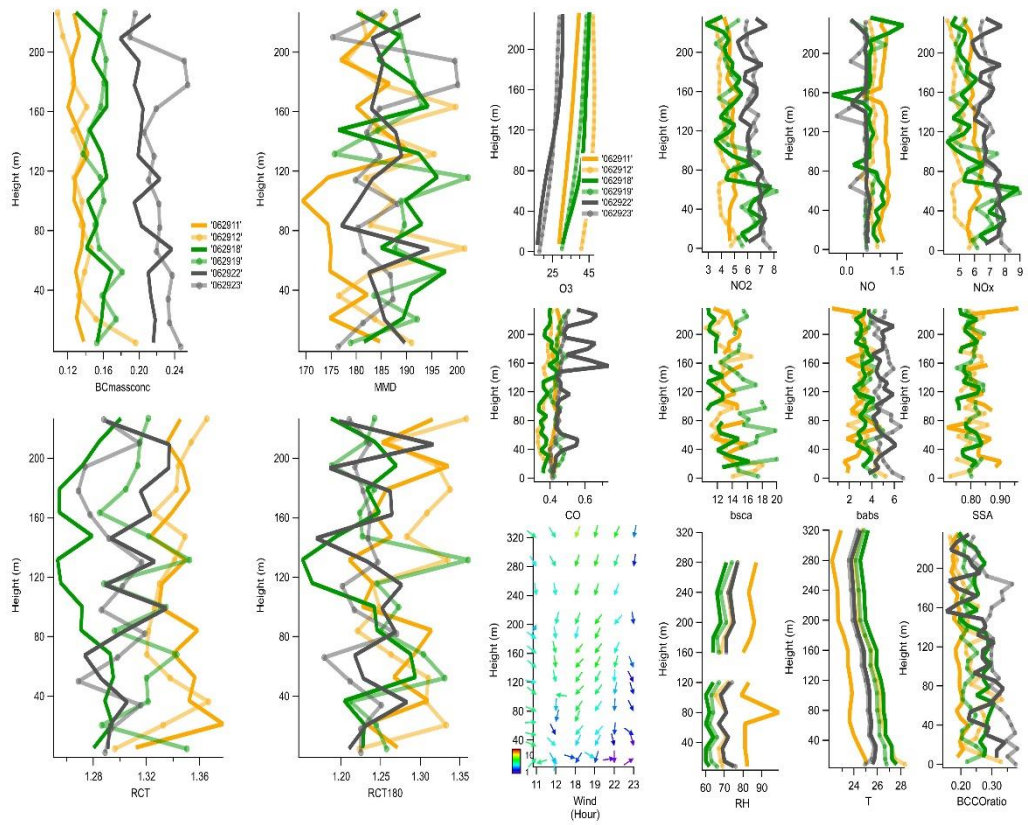

Figure S9 Vertical profiles during 29<sup>th</sup> June

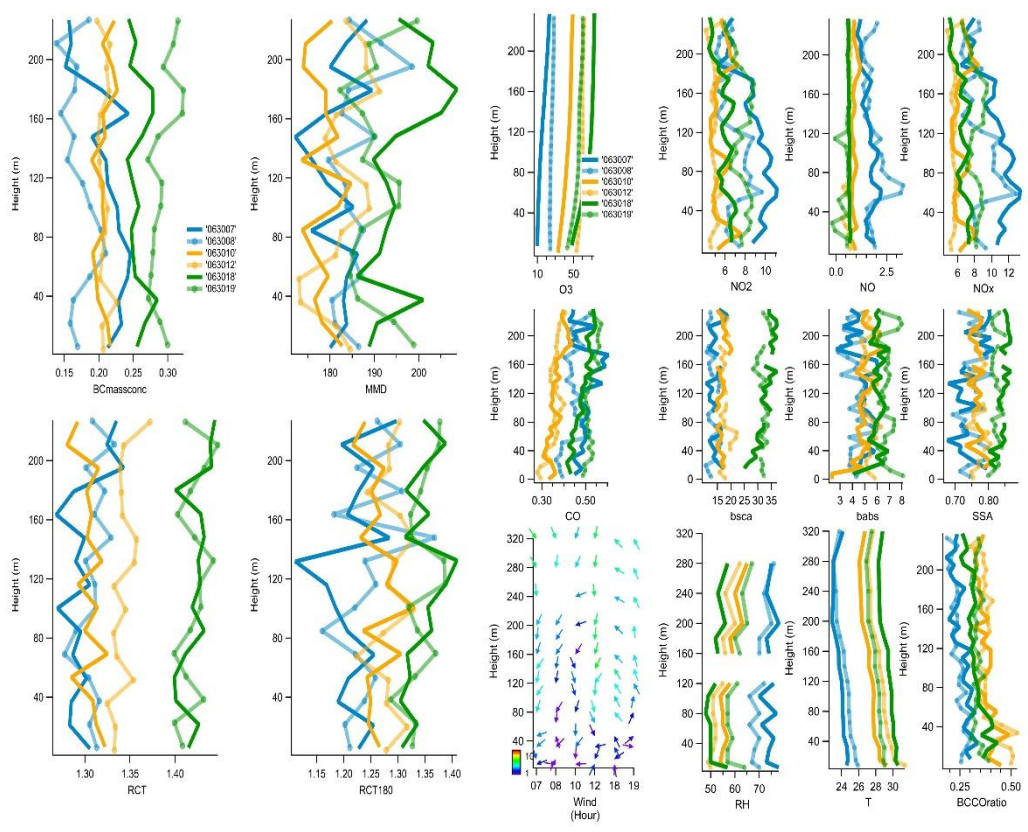

Figure S10 Vertical profiles during 30<sup>th</sup> June



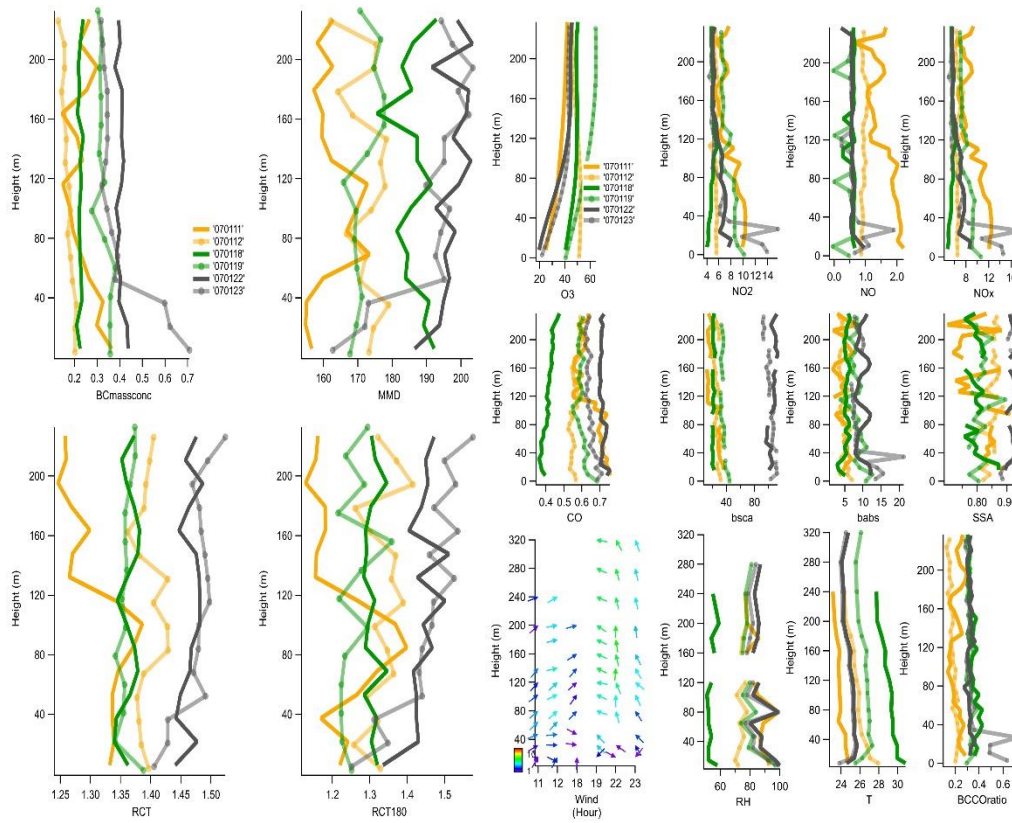

Figure S11 Vertical profiles during 1<sup>st</sup> July

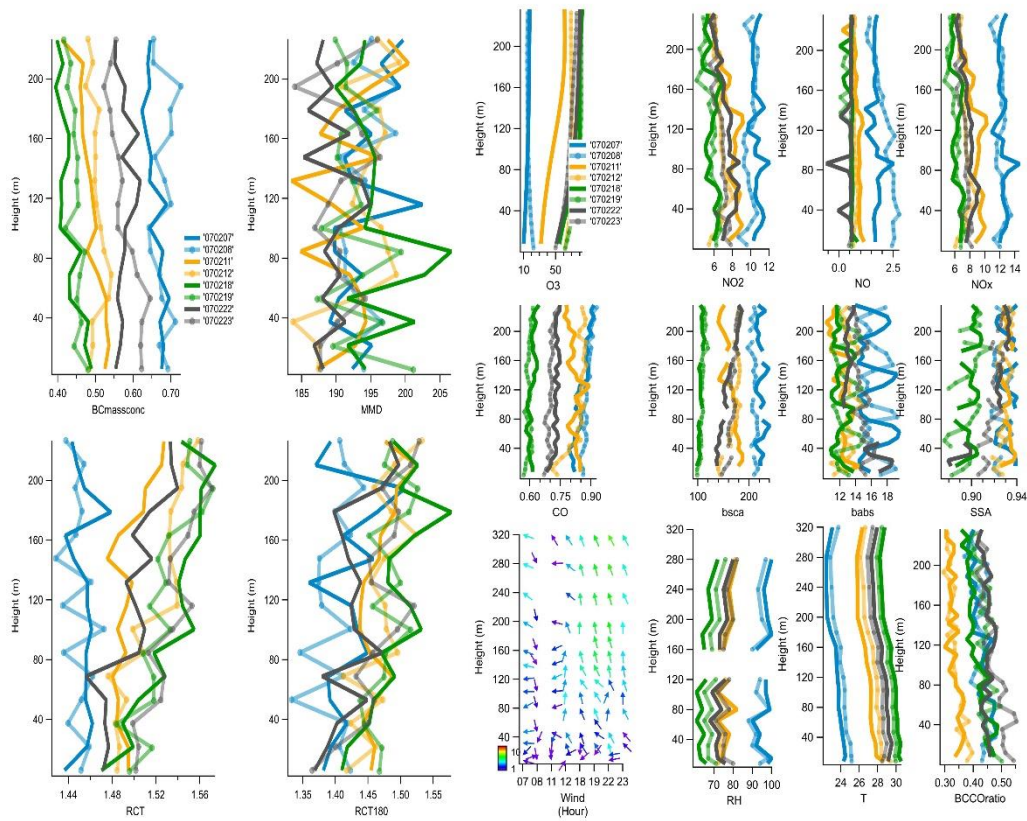

Figure S12 Vertical profiles during 2<sup>nd</sup>

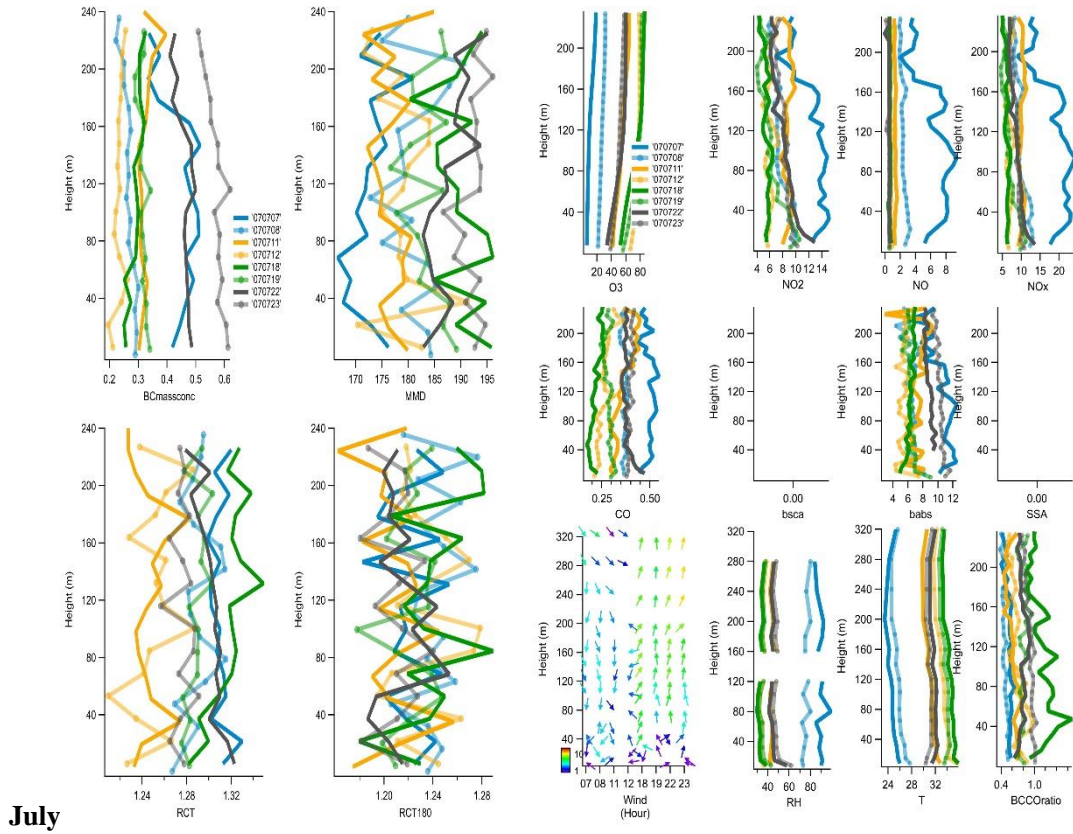

**Figure S13 Vertical profiles during 3<sup>rd</sup> July**

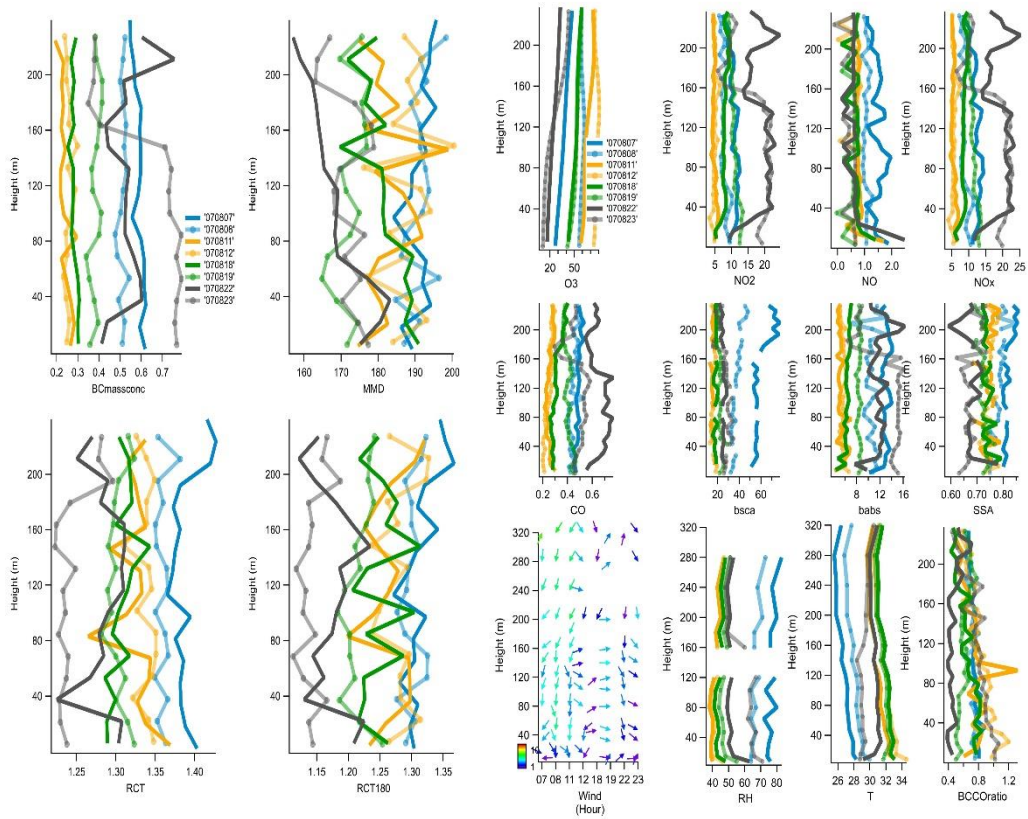

**Figure S14 Vertical profiles during 8<sup>th</sup> July**

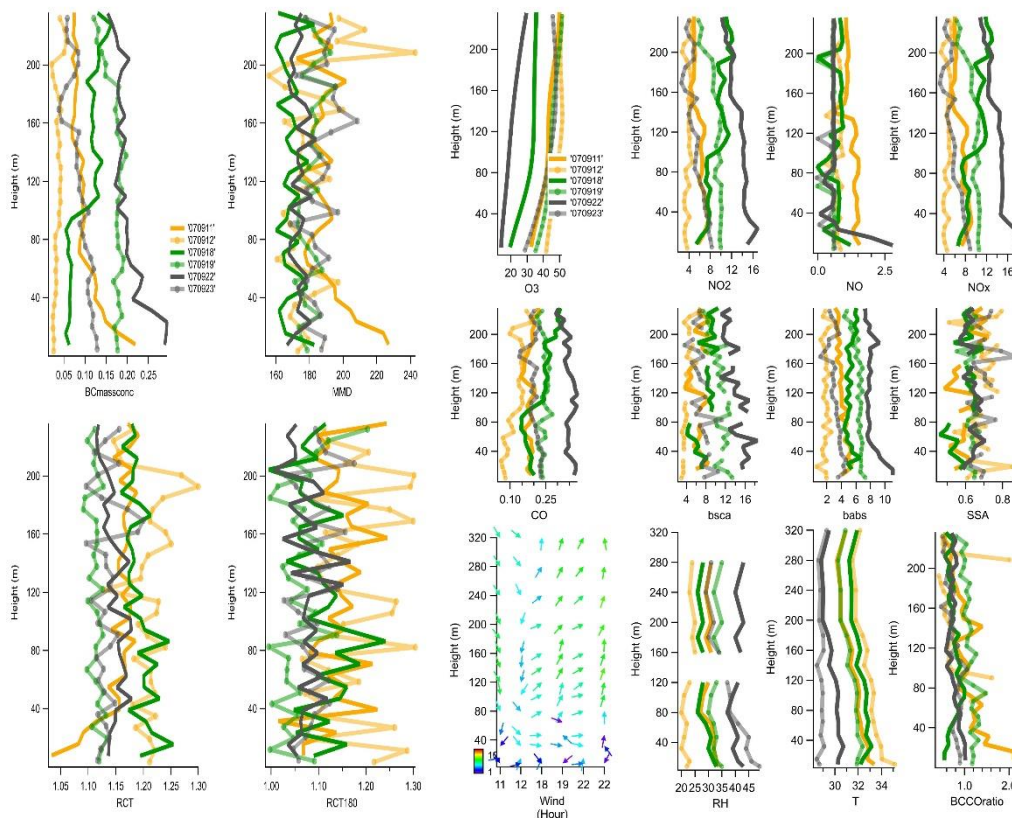

Figure S15 Vertical profiles during 9<sup>th</sup> July

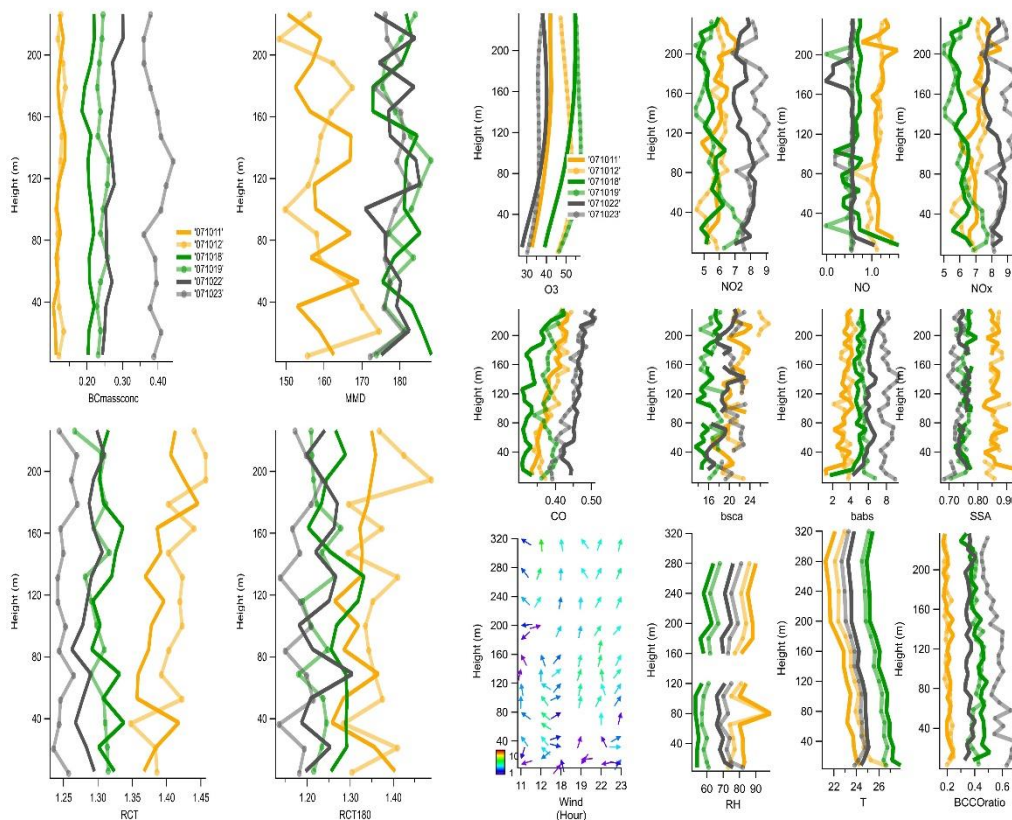

Figure S16 Vertical profiles during 10<sup>th</sup> July

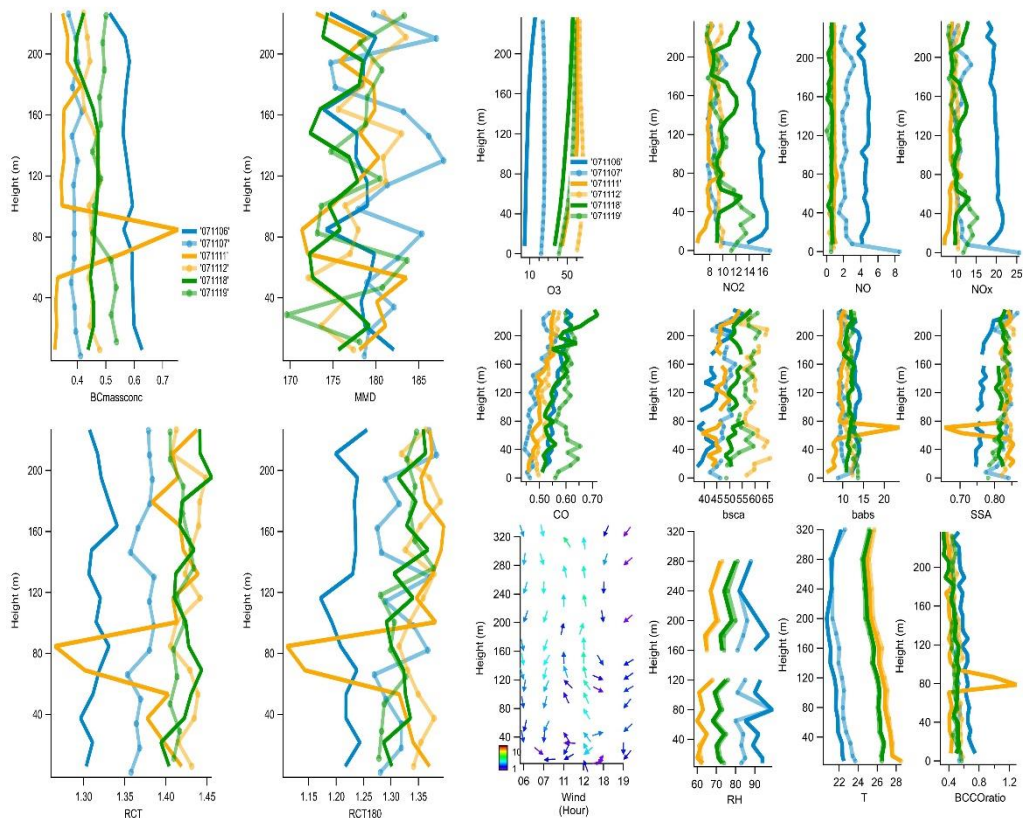

Figure S17 Vertical profiles during 11<sup>th</sup> July

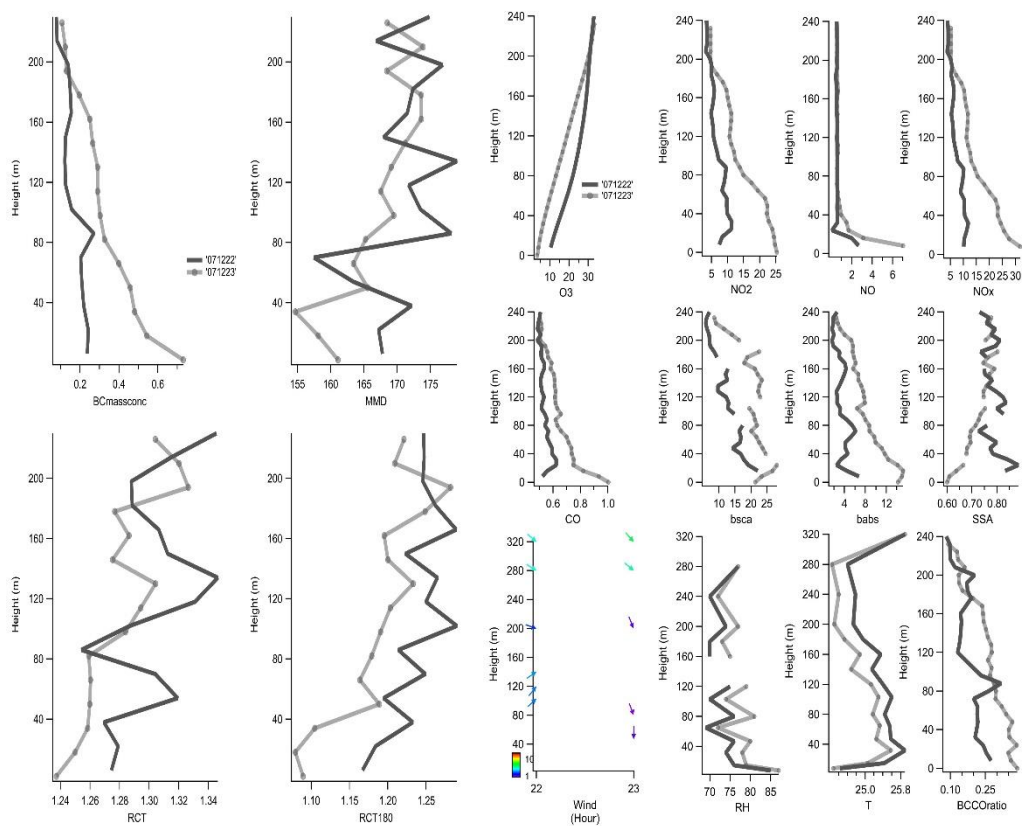

Figure S18 Vertical profiles during 12<sup>th</sup> July

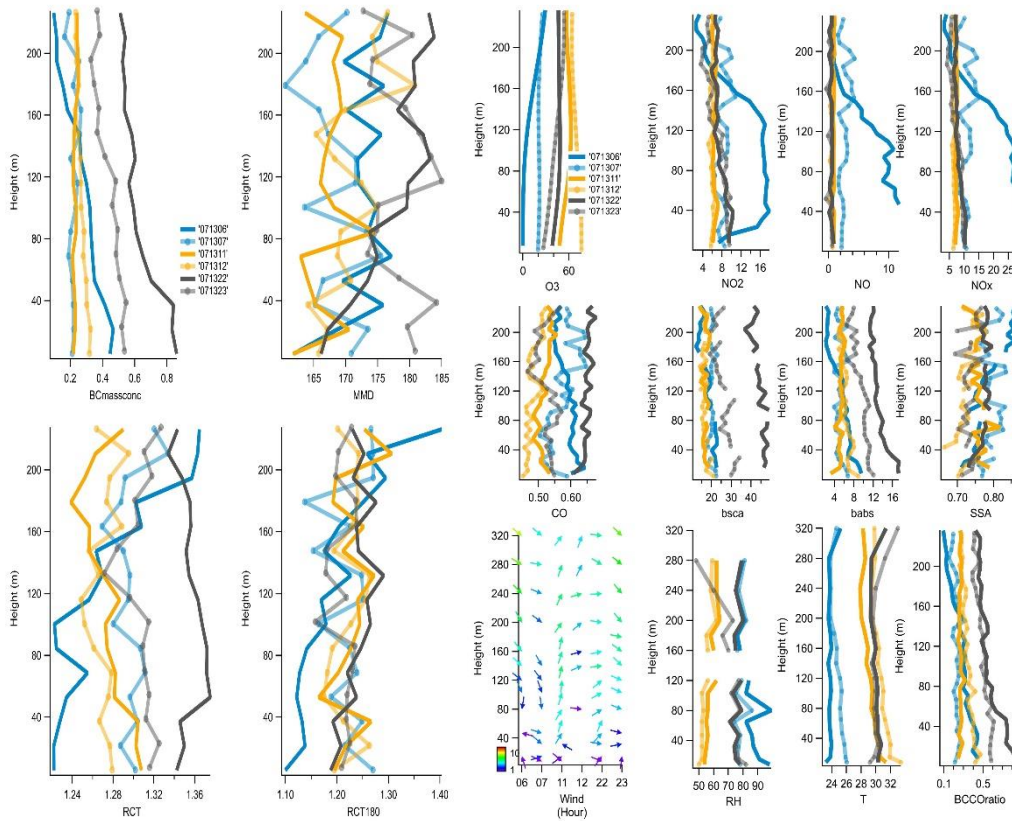

Figure S19 Vertical profiles during 13<sup>th</sup> July

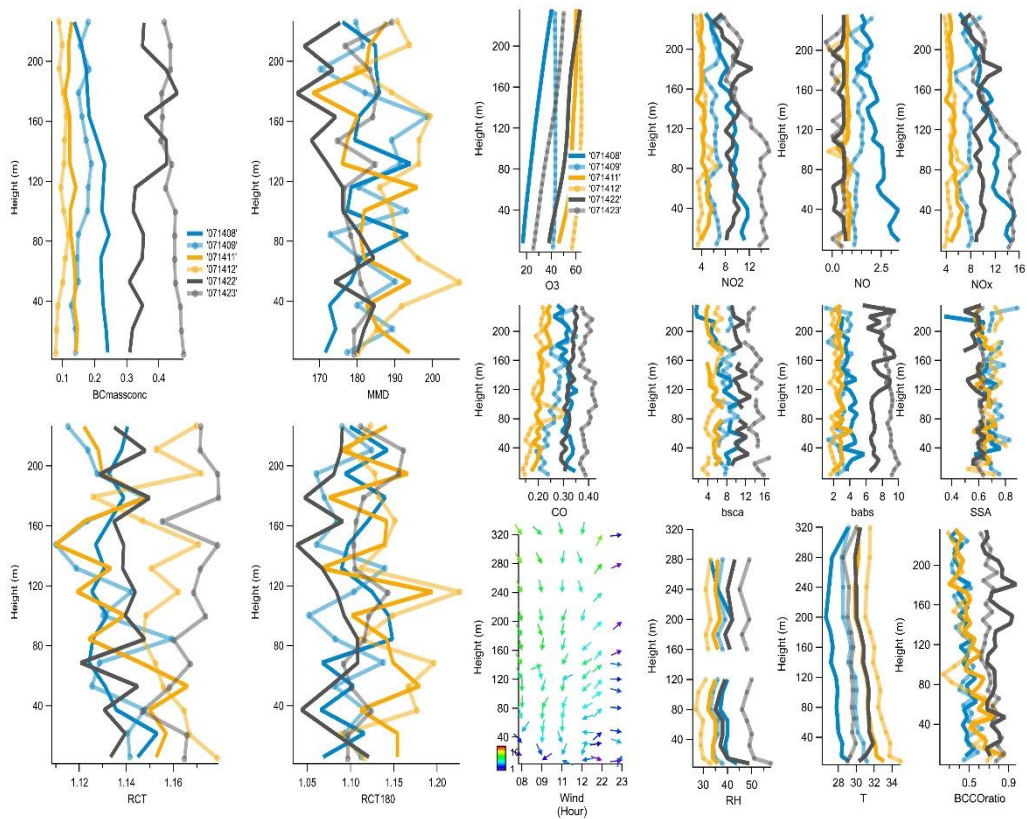

Figure S20 Vertical profiles during 14<sup>th</sup> July

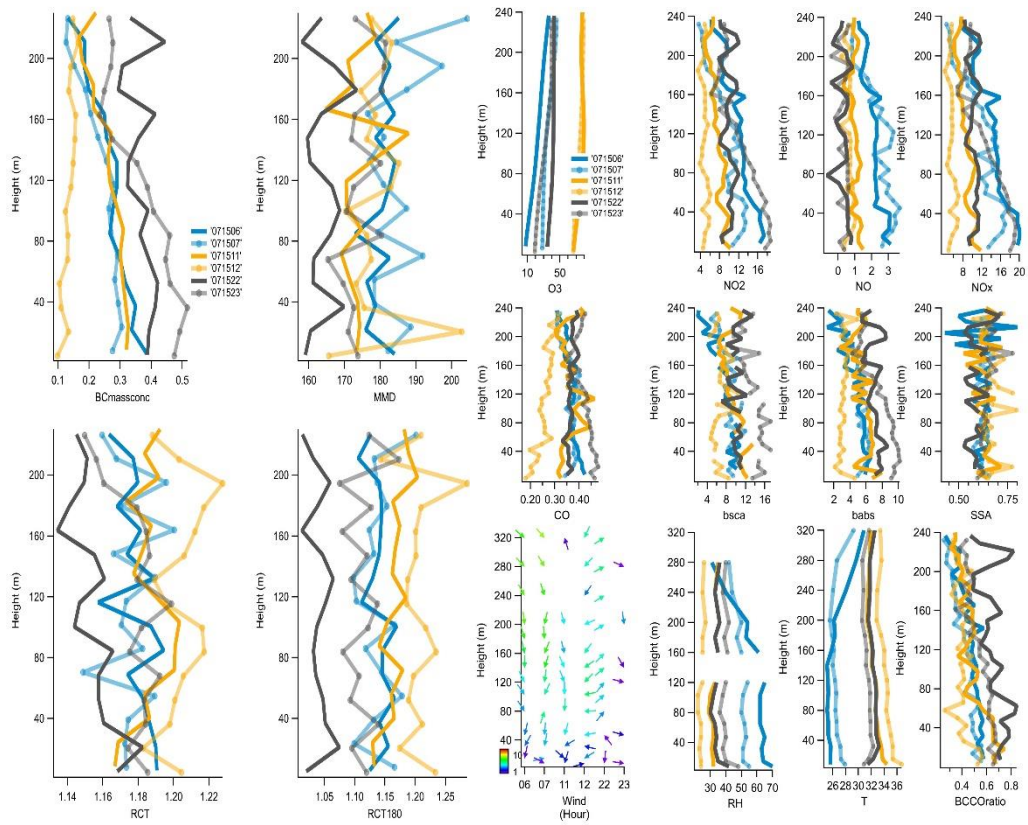

**Figure S21 Vertical profiles during 15<sup>th</sup> July**

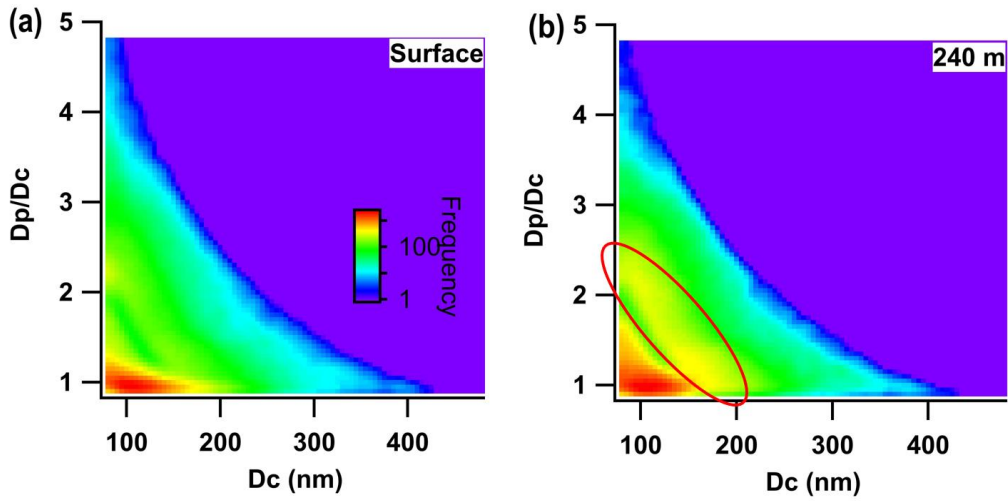

Figure S22 The size-resolved  $D_p/D_c$  at 23:00 27<sup>th</sup> June. (a) the surface level, (b) the 240 m level.

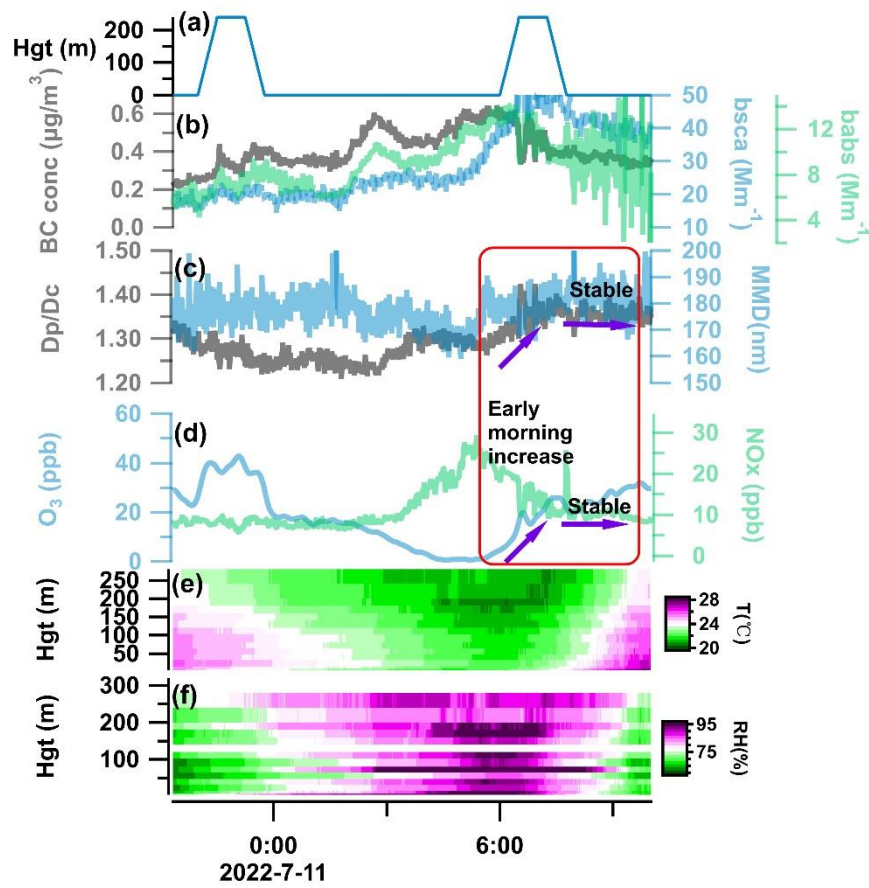

Figure S23 Another case of vertical mixing leading to the increase of  $O_3$  and  $D_p/D_c$  in the morning.

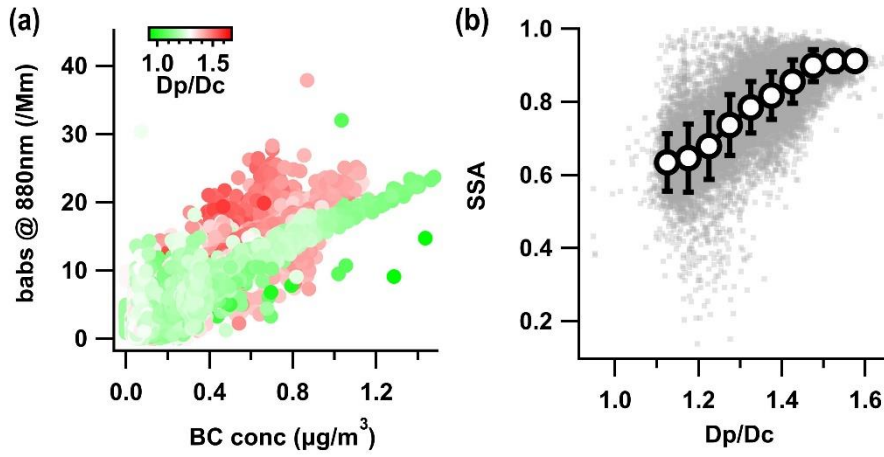

Figure S24 (a)The relationship between BC concentration and  $b_{\text{abs}}$ . (b)The relationship between SSA and  $D_p/D_c$ .

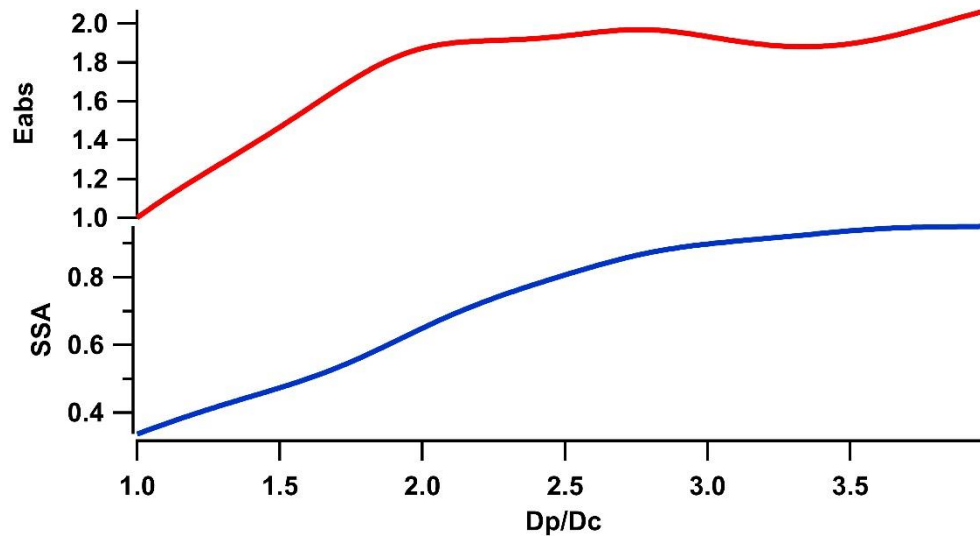

Figure S25 The variation of  $E_{\text{abs}}$  and SSA with  $D_p/D_c$  for BC-containing particles with  $D_c=170$  nm through Mie-theory.



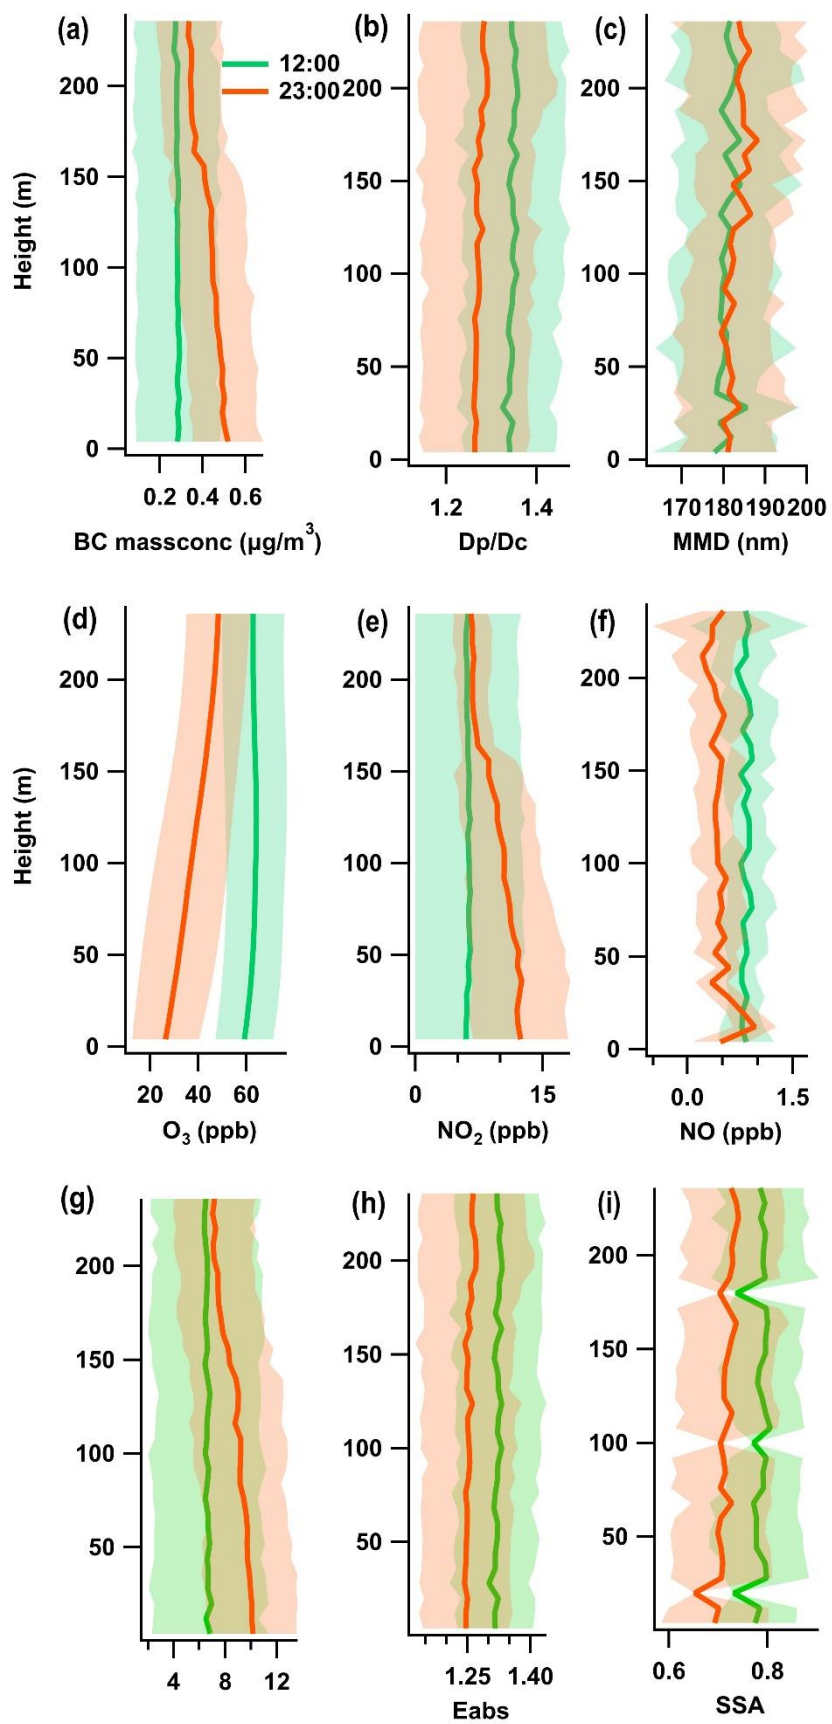

Figure S26 The same as Fig. 4 but with error bars.
